# Supplementary material
Source: publisher figshare collection journal article supplement (https://geolsoc.figshare.com/ndownloader/files/5426801)
Supplement: Supplementary file 1 [file 5426801]

Electronic Appendix 1					Geographic coordinates, WGS84 datum
West Greenland Mesozoic to Palaeogene intrusions					Decimal deg.	Decimal deg.			Degr minut W		Degr minut N
Sample no	Comment	Rock name	Age, Ma	Age reference	Degrees W	Degrees N		Deg.	Minutes	Deg.	Minutes
Tuttutooq sills
50068	upper part of sill	Camptonite	115.4±4.7 (Ar-Ar)	This work	-46.3162	60.804		-46	-18.972	60	48.240
50071	centre of same sill	Camptonite			-46.3162	60.804		-46	-18.972	60	48.240
South West Greenland dyke swarm (TD dykes)
26388	Sanerut	Basalt	141.1±2.2 (Ar-Ar)	This work	-48.0132	61.0379		-48	-0.792	61	2.274
45293	Qaarsuarsuk	Basalt	133.3±1.4 (Ar-Ar)	Larsen et al. 1999	-47.0211	60.8301		-47	-1.266	60	49.806
84556	N of Paamiut	Basalt	138.6±1.4 (Ar-Ar)	Larsen et al. 1999	-49.7127	62.3387		-49	-42.762	62	20.322
Pyramidefjeld - Midternæs
126738	Pyramidefjeld	Aillikite	149.8±0.6 (U-Pb)	This work	-48.29041	61.42485		-48	-17.425	61	25.491
126746.12	Pyramidefjeld	Aillikite			-48.25156	61.41236		-48	-15.094	61	24.742
JA71-20	Midternæs	Aillikite	152±1 (U-Pb)	This work	-48.12354	61.54253		-48	-7.412	61	32.552
Frederikshåb Isblink
118016	Melilitite	Alnöite	152.1±1.6 (U-Pb)	This work	-50.1094	62.7267		-50	-6.564	62	43.602
78760	Big lamprophyre	Monchiquite	149.8±4.4 (Rb-Sr)	This work	49.367	62.383		49	22	62	23
183560	Nephelinite	Monchiquite	156 ± 14 (Rb-Sr)	This work	-50.55387	62.8763		-50	-33.232	62	52.578
183564c	Ol-nephelinite	Monchiquite	149.2±2.7 (Rb-Sr)	This work	-50.2781	62.6577		-50	-16.686	62	39.462
120403	Phonolite	Phonolite	106.0±1.5 (Ar-Ar)	This work	-50.3771	62.8451		-50	-22.626	62	50.706
Færingehavn
265872		Aillkite	223±0.3 (Rb-Sr)	This work	-51.5587	63.6483		-51	-33.522	63	38.898
265877		Aillkite	159±0.2 (Rb-Sr)	This work	-51.5698	63.69713		-51	-34.188	63	41.828
Godthåbsfjord
201449		Camptonite	51.7±0.9 (Ar-Ar)	This work	-51.800	64.117		-51	-48	64	7
265896		Camptonite			-51.6879	64.1574		-51	-41.272	64	9.442
Søndre Isortoq
KØ 15927		Camptonite			-52.3758	65.3630		-52	-22.55	65	21.78
KØ 17088		Alkali basalt			-52.6382	65.3903		-52	-38.29	65	23.42
KØ 17090	Same as 17088	Alkali basalt	58.5±0.6 (Ar-Ar)	This work	-52.6382	65.3903		-52	-38.29	65	23.42
KØ 17154		camptonite	55.7±0.6 (Ar-Ar)	This work	-52.5225	65.4730		-52	-31.35	65	28.38
Qaqqarsuk
223775		Carbonatite	~165 (U-Pb)	Secher et al. 2009	-51.69928	65.36963		-51	-41.957	65	22.178
Fossilik
409788.1	Drillcore 2001	Aillikite	164 (Rb-Sr)	Secher et al. 2009	-51.5381	65.3756		-51	-32.286	65	22.536
Itilleq
464627	Plag-phyric dyke	Tholeiitic basalt	64.1±1.3 (Ar-Ar)	This work	-53.302906	66.446877		-53	-18.174	66	26.813
Aasiaat region
455791	Grønne Ejland sill	Tholeiitic basalt			-51.9688	68.8360		-51	-58.1308	68	50.1573
455793	Grønne Ejland sill	Tholeiitic basalt	60.9±0.9 (Ar-Ar)	This work	-51.9688	68.8360		-51	-58.1308	68	50.1573
464536	globular dyke	Tholeiitic basalt	56.1±0.2 (Ar-Ar)	This work	-52.5542	68.2112		-52	-33.25	68	12.67
South-eastern Nuussuaq
318712	Tartunaq	Tholeiitic basalt			-52.1930	70.0374		-52	-11.5802	70	2.2468
318802	Same as 318712	Tholeiitic basalt	56.8±0.8 (Ar-Ar)	This work	-52.1293	70.0489		-52	-7.7591	70	2.9355
Ubekendt Ejland
UE500=265895	Drever's block	Monchiquite	34.5±0.2 (Ar-Ar)	Storey et al. 1998	-53.8611	71.2285		-53	-51.6667	71	13.7097
Uummannaq Fjord
482915	Local block	Aillikite	185.9±0.1 (Rb-Sr)	This work	-52.4271	71.2151		-52	-25.625	71	12.907
